# Supplementary material for: Characterisation and Risk Assessment of Metal Contaminants in the Dust Fall in the Vicinity of a Construction Waste Dump in Beijing
Source: MDPI journal article supplement (doi:10.3390/ijerph192013019), 2022-10-11
Supplement: s1 [file s1]

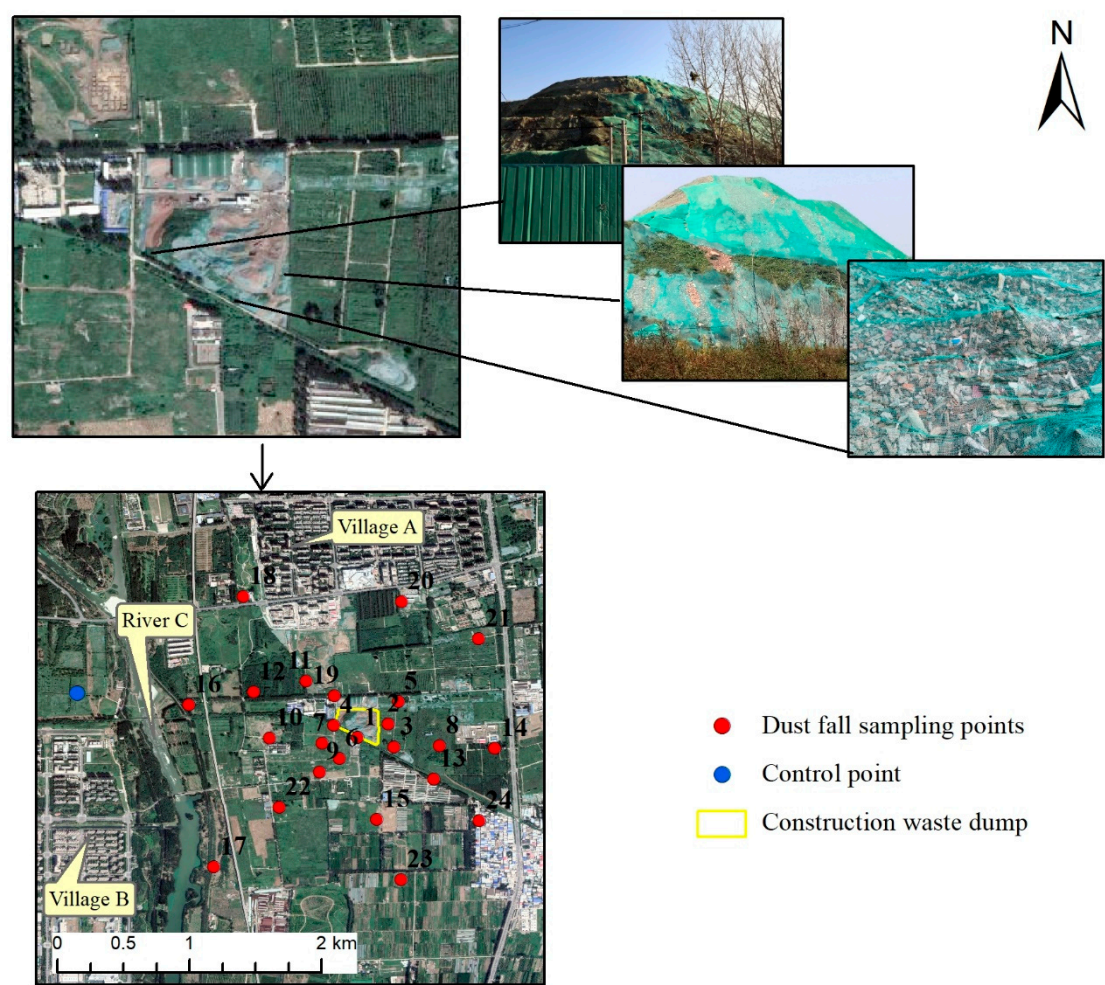

Figure S1. Study area and distribution of dust fall sampling points

Table S1. Correspondence between the level of contamination and geo-accumulation index

| Grade | $I_{geo}$ | Level of contamination                  |
|-------|-----------|-----------------------------------------|
| 0     | $\leq 0$  | No contamination                        |
| 1     | 0–1       | Light contamination                     |
| 2     | 1–2       | Moderate contamination                  |
| 3     | 2–3       | Moderate to severe contamination        |
| 4     | 3–4       | Severe contamination                    |
| 5     | 4–5       | Severe to extremely heavy contamination |
| 6     | $>5$      | Extremely heavy contamination           |

Table S2. Potential ecological risk classification

| $E_i$                | Individual potential<br>ecological risk level | $RI$                | Comprehensive potential<br>ecological risk level |
|----------------------|-----------------------------------------------|---------------------|--------------------------------------------------|
| $E_i < 10$           | Minor risk                                    | $RI < 50$           | Minor risk                                       |
| $10 \leq E_i < 40$   | Low risk                                      | $50 \leq RI < 150$  | Low risk                                         |
| $40 \leq E_i < 80$   | Moderate risk                                 | $150 \leq RI < 300$ | Moderate risk                                    |
| $80 \leq E_i < 160$  | Considerable risk                             | $300 \leq RI < 600$ | High risk                                        |
| $160 \leq E_i < 320$ | High risk                                     | $RI \geq 600$       | Extremely high risk                              |
| $E_i \geq 320$       | Extremely high risk                           | /                   | /                                                |

Note: / indicates no data

Table S3. Enrichment factors of various metals found in dust fall in the vicinity of the  
construction waste yard

| Distance      | Number | Cd    | Ca    | Zn    | Cu    | Mn   | Fe   | Pb   | Cr   | As   | Ni   | V    | Co   | Mg   | Al   |
|---------------|--------|-------|-------|-------|-------|------|------|------|------|------|------|------|------|------|------|
| <250 m        | 1      | 10.56 | 14.52 | 9.77  | 8.06  | 7.87 | 7.74 | 4.30 | 4.13 | 3.74 | 2.72 | 2.24 | 1.68 | 1.50 | 0.34 |
|               | 2      | 5.14  | 8.41  | 3.19  | 2.10  | 3.37 | 2.79 | 1.44 | 1.42 | 1.19 | 1.13 | 0.84 | 0.64 | 6.00 | 1.36 |
|               | 3      | 19.64 | 10.21 | 3.04  | 2.47  | 2.52 | 0.93 | 1.89 | 1.31 | 1.12 | 1.01 | 0.86 | 0.63 | 9.64 | 0.56 |
|               | 4      | 5.25  | 11.18 | 8.92  | 4.47  | 5.36 | 5.12 | 2.63 | 2.23 | 2.58 | 1.74 | 1.49 | 1.07 | 1.63 | 1.14 |
|               | 5      | 7.13  | 6.23  | 6.89  | 3.26  | 3.66 | 3.72 | 2.71 | 2.44 | 1.45 | 1.41 | 1.04 | 0.79 | 3.33 | 1.41 |
|               | 6      | 17.46 | 13.58 | 16.56 | 6.38  | 6.55 | 0.81 | 5.56 | 2.60 | 2.64 | 3.54 | 0.73 | 1.46 | 3.06 | 0.53 |
|               | 7      | 13.22 | 20.47 | 12.12 | 10.25 | 4.77 | 1.21 | 2.03 | 1.73 | 1.60 | 1.64 | 1.05 | 0.80 | 2.66 | 0.51 |
| 250-500 m     | 8      | 4.51  | 8.07  | 14.24 | 5.24  | 7.06 | 5.90 | 4.97 | 2.75 | 4.09 | 3.48 | 1.55 | 1.43 | 2.53 | 0.47 |
|               | 9      | 4.50  | 10.39 | 7.41  | 5.14  | 3.70 | 3.24 | 1.40 | 1.50 | 1.01 | 1.45 | 1.20 | 0.61 | 2.32 | 0.40 |
|               | 10     | 12.94 | 21.35 | 16.98 | 6.73  | 6.79 | 1.18 | 3.67 | 1.76 | 2.08 | 2.41 | 1.10 | 1.26 | 5.07 | 0.73 |
|               | 11     | 5.73  | 4.93  | 2.91  | 1.48  | 2.45 | 2.37 | 1.11 | 1.21 | 0.89 | 0.84 | 0.65 | 0.53 | 1.16 | 1.03 |
|               | 12     | 9.01  | 8.96  | 6.17  | 3.77  | 4.16 | 4.55 | 2.27 | 2.18 | 1.47 | 1.55 | 1.26 | 0.90 | 1.41 | 1.15 |
|               | 13     | 6.42  | 10.60 | 4.69  | 3.20  | 3.65 | 2.41 | 2.18 | 2.45 | 1.27 | 1.42 | 0.86 | 0.75 | 4.90 | 1.40 |
| 500-1000<br>m | 14     | 40.70 | 16.49 | 10.50 | 5.65  | 9.88 | 6.68 | 3.42 | 2.63 | 2.39 | 2.71 | 1.79 | 1.51 | 7.10 | 0.51 |
|               | 15     | 24.83 | 11.83 | 9.44  | 3.95  | 3.06 | 0.95 | 1.62 | 1.27 | 1.40 | 1.14 | 0.85 | 0.70 | 4.85 | 0.53 |
|               | 16     | 3.84  | 17.19 | 6.81  | 10.64 | 4.09 | 0.99 | 2.70 | 1.44 | 1.80 | 1.38 | 0.87 | 0.79 | 5.51 | 0.45 |
|               | 17     | 3.49  | 16.32 | 7.31  | 8.68  | 5.40 | 4.80 | 3.30 | 2.59 | 2.48 | 1.91 | 1.30 | 1.04 | 4.09 | 0.44 |

|               |    |       |       |      |      |      |      |      |      |      |      |      |      |       |      |
|---------------|----|-------|-------|------|------|------|------|------|------|------|------|------|------|-------|------|
|               | 18 | 47.49 | 22.47 | 4.81 | 6.20 | 4.00 | 0.71 | 1.81 | 1.05 | 1.66 | 1.83 | 0.65 | 0.88 | 13.16 | 0.47 |
| Control point |    | 4.90  | 9.86  | 5.45 | 6.10 | 3.75 | 2.92 | 2.87 | 1.95 | 1.94 | 1.56 | 1.12 | 0.90 | 4.15  | 0.44 |

Table S4. Metal contents of different types of construction waste

| Element | Concrete  | Red brick | Marble    | Ceramic tile | Glass    | Wood     | Plastic pipe | Plaster   |
|---------|-----------|-----------|-----------|--------------|----------|----------|--------------|-----------|
| Ca      | 131935.42 | 10863.19  | 372751.25 | 13751.89     | 58328.97 | 19412.62 | 169600.14    | 219827.75 |
| Fe      | 24432.84  | 5917.31   | 2475.31   | 7039.50      | 7247.48  | 1544.86  | 2482.61      | 1608.76   |
| Mg      | 16112.81  | 2042.28   | 2571.64   | 4807.30      | 20954.18 | 2756.73  | 8788.69      | 92600.57  |
| Al      | 11106.40  | 6026.37   | 653.29    | 6615.84      | 4596.24  | 1298.51  | 1983.13      | 1753.62   |
| Cr      | 842.81    | 11.03     | 30.42     | 901.55       | 1669.19  | 16.61    | 70.30        | 4.72      |
| Mn      | 532.72    | 141.39    | 330.76    | 127.01       | 114.75   | 56.23    | 105.63       | 97.22     |
| V       | 54.36     | 11.70     | 1.24      | 12.75        | 12.36    | 4.70     | 8.63         | 4.34      |
| Ni      | 23.90     | 1.79      | 2.53      | 22.24        | 167.24   | 2.43     | 12.08        | 0.57      |
| Zn      | 17.91     | 1.49      | 0.00      | 31.73        | 356.14   | 37.09    | 26.86        | 3.79      |
| Pb      | 8.48      | 5.04      | 2.29      | 4.54         | 12.64    | 2.68     | 3196.61      | 2.02      |
| Cu      | 6.48      | 2.46      | 0.04      | 2.20         | 3.53     | 6.11     | 2.16         | 1.44      |
| Co      | 5.61      | 1.84      | 0.73      | 2.36         | 6.44     | 0.80     | 1.02         | 0.69      |
| As      | 4.49      | 4.60      | 1.90      | 3.65         | 2.87     | 2.04     | 2.54         | 2.38      |
| Cd      | 0.00      | 0.01      | 0.03      | 0.02         | 0.03     | 0.28     | 0.19         | 0.32      |
